# Supplementary material for: Optimal Sampling Strategies for Detecting Zoonotic Disease Epidemics
Source: PLOS journal article supplement (doi:10.1371/journal.pcbi.1003668), 2014-06-26
Supplement: S4 (10.1371/journal.pcbi.1003668.s004) [file journal.pcbi.1003668.s004]

## S2 KKT conditions

In this appendix, we will apply the Karush-Kuhn-Tucker optimization conditions to the probability model (10) derived in section S1. The probability of detecting a disease which can infect  $n$  populations is given by

$$P\left(\bigcup_{i=1}^n D_i(t)\right) = 1 - e^{-\sum_{i=1}^n s_i I_i(t)/N_i}$$

for all  $n \geq 1$  where  $s_i$  is the number of samples taken from population  $i$ ,  $1 \leq i \leq n$ , and  $D_i$  is the set of events such that the disease is detected from a sample of size  $s_i$  from population  $i$ .

To maximize the probability of detecting at least one infected individual, we must minimize

$$f(s_1, \dots, s_n) := -\sum_{i=1}^n s_i \frac{I_i(t)}{N_i}. \quad (\text{S3})$$

Though completely unrealistic, the above quantity would be minimized if we take  $s_i$ , the number of sampled individuals, arbitrarily large. To incorporate a modicum of realism, we assume that we must sample under a given cost constraint. We let  $C_{\max}$  be the budget for a given sampling scheme  $s = (s_1, \dots, s_n)$  and let  $C(s_1, \dots, s_n)$  be the cost of sampling  $s_i$  individuals from population  $i$ . If we assume that we spend our entire budget, we have introduced the cost constraint  $C(s_1, \dots, s_n) = C_{\max}$ . We additionally require that all sample sizes  $s_i$  are nonnegative.

To minimize the objective function (S3) under the constraints

$$h(s) := C(s_1, \dots, s_n) - C_{\max} = 0 \quad (\text{S4})$$

$$g(s) := \begin{pmatrix} -s_1 \\ \vdots \\ -s_n \end{pmatrix} \leq 0 \quad (\text{S5})$$

where  $s \in \mathbb{R}^n$ , we apply the Karush-Kuhn-Tucker conditions. If  $s^* \in \mathbb{R}^n$  is a local minimum of the objective function (S3), then there exist constants  $\mu_i$ ,  $1 \leq i \leq n$  and  $\lambda$  such that

$$\nabla f(s^*) + \sum_{i=1}^n \mu_i \nabla g_i(s^*) + \lambda \nabla h(s^*) = 0 \quad (\text{S6})$$

$$\mu_i \geq 0, \quad 1 \leq i \leq n \quad (\text{S7})$$

$$\mu_i g_i(s^*) = 0, \quad 1 \leq i \leq n \quad (\text{S8})$$

where  $f, g$  and  $h$  are defined in (S3), (S4) and (S5).

### KKT Conditions for a linear objective function

Since our objective function  $f(s)$  and primal feasibility condition (S5) are linear, the stationarity equation (S6) is relatively simple:

$$\begin{aligned} \nabla f(s^*) + \sum_{i=1}^n \mu_i \nabla g_i(s^*) + \lambda \nabla h(s^*) &= 0 \\ \begin{pmatrix} -\frac{I_1(t)}{N_1} \\ \vdots \\ -\frac{I_n(t)}{N_n} \end{pmatrix} + \begin{pmatrix} -\mu_1 \\ \vdots \\ -\mu_n \end{pmatrix} + \lambda \begin{pmatrix} C_{s_1}(s^*) \\ \vdots \\ C_{s_n}(s^*) \end{pmatrix} &= 0 \end{aligned}$$

- 1 where  $C_{s_i}(s^*) = \frac{\partial C}{\partial s_i}(s^*)$ . If we let  $P_i(t) = \frac{I_i(t)}{N_i}$  be the proportion of individuals in population  $i$  that  
 2 are infected at time  $t$ , the above expression becomes

$$\begin{pmatrix} -P_1(t) \\ \vdots \\ -P_n(t) \end{pmatrix} + \begin{pmatrix} -\mu_1 \\ \vdots \\ -\mu_n \end{pmatrix} + \lambda \begin{pmatrix} C_{s_1}(s^*) \\ \vdots \\ C_{s_n}(s^*) \end{pmatrix} = 0. \quad (\text{S9})$$

- 3 The dual feasibility (S7) and complementary slackness (S8) conditions become

$$\mu_i \geq 0, \quad 1 \leq i \leq n \quad (\text{S10})$$

$$\mu_i s_i^* = 0, \quad 1 \leq i \leq n. \quad (\text{S11})$$

- 4 In the following analysis, we assume that  $C_{s_i}(s) > 0$  for each  $i$  and all nonnegative  $s$ , that is, we  
 5 assume that increasing the number of samples increases the cost of sampling. To find candidates for  
 6 the local minimizer  $s^*$ , we solve (S9) in four cases. A summary of these four cases is given in Table  
 7 1 in Text S2.

**Table 1 in Text S2. Summary of Section S2 with all possible cases listed.**

|        | $\lambda$                                                                        | $\mu_i$                                                           | $P_i(t)$                                                                                                            | $s^*$                                                             |
|--------|----------------------------------------------------------------------------------|-------------------------------------------------------------------|---------------------------------------------------------------------------------------------------------------------|-------------------------------------------------------------------|
| Case 1 | $\lambda = 0$                                                                    | $\mu_i = 0, 1 \leq i \leq n$                                      | $P_i(t) = 0, 1 \leq i \leq n$                                                                                       | $s^* \in \mathbb{R}_+^n$                                          |
| Case 2 | $\lambda \neq 0$<br>$\frac{P_i(t)}{C_{s_i}(s^*)} = \lambda$<br>$1 \leq i \leq n$ | $\mu_i = 0, 1 \leq i \leq n$                                      | $P_i(t) > 0, 1 \leq i \leq n$                                                                                       | $s^* \in \mathbb{R}_+^n$                                          |
| Case 3 | $\lambda \neq 0$                                                                 | $\mu_i \neq 0, 1 \leq i \leq n$                                   | $P_i(t) \geq 0, 1 \leq i \leq n$                                                                                    | $s^* = \vec{0}$                                                   |
| Case 4 | $\lambda \neq 0$<br>$\frac{P_i(t)}{C_{s_i}(s^*)} = \lambda$<br>$1 \leq i \leq k$ | $\mu_i = 0, 1 \leq i \leq k$<br>$\mu_j \neq 0, k+1 \leq j \leq n$ | $P_i(t) > 0, 1 \leq i \leq k$<br>$\frac{P_i(t)}{C_{s_i}(s^*)} > \frac{P_j(t)}{C_{s_j}(s^*)}$<br>$k+1 \leq j \leq n$ | $s_i^* \geq 0, 1 \leq i \leq k$<br>$s_j^* = 0, k+1 \leq j \leq n$ |

- 8 Case 1:  $\lambda = 0$ .  
 9 If  $\lambda = 0$ , then (S9) becomes

$$\begin{pmatrix} -P_1(t) \\ \vdots \\ -P_n(t) \end{pmatrix} + \begin{pmatrix} -\mu_1 \\ \vdots \\ -\mu_n \end{pmatrix} = 0$$

$$\begin{pmatrix} -P_1(t) \\ \vdots \\ -P_n(t) \end{pmatrix} = \begin{pmatrix} \mu_1 \\ \vdots \\ \mu_n \end{pmatrix}$$

- 10 By (S10) and since  $P_i(t) \geq 0$ , we have that  $\lambda = 0$  if and only if  $P_i(t) = 0$  for all  $1 \leq i \leq n$ . (Indeed,  
 11 suppose that  $P_i(t) > 0$  for some  $1 \leq i \leq n$ . Then  $\mu_i = -P_i(t) < 0$ , a contradiction to (S10).) Then  
 12 it must also be true that  $\mu_i = 0$  for all  $1 \leq i \leq n$ . Then (S11) is satisfied for any choice of  $s_i^*$ . This  
 13 implies that if the disease is not present, any sampling scheme will give the same (zero) probability  
 14 of detection.

- 15 Case 2:  $\lambda \neq 0, \mu_i = 0, 1 \leq i \leq n$ .  
 16 If  $\mu_i = 0, 1 \leq i \leq n$ , then (S9) becomes

$$\lambda \begin{pmatrix} C_{s_1}(s^*) \\ \vdots \\ C_{s_n}(s^*) \end{pmatrix} = \begin{pmatrix} P_1(t) \\ \vdots \\ P_n(t) \end{pmatrix}.$$

1 Since  $C_{s_i}(s) > 0$  for all nonnegative  $s$  and all  $i$ ,

$$\lambda = \frac{P_i(t)}{C_{s_i}(s^*)}$$

2 for all  $i$ . Then

$$\frac{P_i(t)}{C_{s_i}(s^*)} = \lambda = \frac{P_j(t)}{C_{s_j}(s^*)} \quad \text{for all } 1 \leq i \leq n, 1 \leq j \leq n. \quad (\text{S12})$$

3 Since  $\mu_i = 0$ ,  $1 \leq i \leq n$ , (S11) holds for any choice of  $s_i^*$ ,  $1 \leq i \leq n$ . Note that  $\lambda \neq 0$  then implies  
4 that  $P_i(t) > 0$  for all  $i$ . Thus, the above analysis implies that it is possible that the optimal sampling  
5 scheme is to sample all of the populations if and only if  $P_i > 0$  for all  $1 \leq i \leq n$ . Indeed, otherwise  
6 (S12) implies that  $0 = \lambda = P_i$  for all  $1 \leq i \leq n$ .

7 Case 3:  $\lambda \neq 0$ ,  $\mu_i \neq 0$ ,  $1 \leq i \leq n$ .

8 By (S11), if  $\mu_i \neq 0$ , then  $s_i^* = 0$ . Since  $\mu_i \neq 0$  for all  $1 \leq i \leq n$ , this implies that  $s^* = \vec{0}$ . Since  
9  $s^*$  must satisfy (S4), this corresponds to the case where the total overhead cost equals the budget:  
10  $C(0) = C_{max}$ .

Case 4:  $\lambda \neq 0$ ,  $\mu_i = 0$ ,  $1 \leq i \leq k$ ,  $\mu_j \neq 0$ ,  $k+1 \leq i \leq n$  for some integer  $k \in (1, n)$ .

Fix some integer  $k \in (1, n)$ . Suppose that  $\mu_i = 0$  for all  $1 \leq i \leq k$  and  $\mu_j \neq 0$  for all  $k+1 \leq i \leq n$ .  
Then, as in Case 3, (S11) implies that  $s_j^* = 0$  for  $k+1 \leq j \leq n$  and (S9) becomes

$$\begin{pmatrix} -P_1(t) \\ \vdots \\ -P_k(t) \\ -P_{k+1}(t) \\ \vdots \\ -P_n(t) \end{pmatrix} + \begin{pmatrix} 0 \\ \vdots \\ 0 \\ -\mu_{k+1} \\ \vdots \\ -\mu_n \end{pmatrix} + \lambda \begin{pmatrix} C_{s_1}(s^*) \\ \vdots \\ C_{s_k}(s^*) \\ C_{s_{k+1}}(s^*) \\ \vdots \\ C_{s_n}(s^*) \end{pmatrix} = 0. \quad (\text{S13})$$

11 As in Case 2, the first  $k$  equations above imply that

$$\frac{P_i(t)}{C_{s_i}(s^*)} = \lambda = \frac{P_j(t)}{C_{s_j}(s^*)} \quad \text{for all } 1 \leq i \leq k, 1 \leq j \leq k \quad (\text{S14})$$

12 since  $C_{s_i}(s) > 0$  for all nonnegative  $s$ . Then, since  $\lambda > 0$ ,

$$P_i(t) > 0 \quad \text{for all } 1 \leq i \leq k.$$

13 Furthermore, the last  $n - k$  equations of (S13) together with (S14) imply that

$$\begin{aligned} -P_j(t) - \mu_j + \lambda C_{s_j}(s^*) &= 0, \quad k+1 \leq j \leq n \\ -P_j(t) - \mu_j + \frac{P_i(t)}{C_{s_i}(s^*)} C_{s_j}(s^*) &= 0, \quad 1 \leq i \leq k, k+1 \leq j \leq n \\ -P_j(t) + \frac{P_i(t)}{C_{s_i}(s^*)} C_{s_j}(s^*) &= \mu_j > 0, \quad 1 \leq i \leq k, k+1 \leq j \leq n \\ \iff \frac{P_i(t)}{C_{s_i}(s^*)} &> \frac{P_j(t)}{C_{s_j}(s^*)}, \quad 1 \leq i \leq k, k+1 \leq j \leq n \end{aligned} \quad (\text{S15})$$

- <sub>1</sub> by (S10) since  $\mu_j \neq 0$  for  $k+1 \leq j \leq n$ . Thus, the optimal sampling scheme may be to sample the  
<sub>2</sub> first  $k$  populations if and only if (S15) holds.
