# Supplementary material for: Optimal Sampling Strategies for Detecting Zoonotic Disease Epidemics
Source: PLOS journal article supplement (doi:10.1371/journal.pcbi.1003668), 2014-06-26
Supplement: S5 (10.1371/journal.pcbi.1003668.s005) [file journal.pcbi.1003668.s005]

### 1 S3 General SI Analysis

2 We now give an example of how the analysis in section S2 can be used to determine the optimal  
 3 sampling scheme for maximizing the probability of detecting a vector borne disease that follows SI  
 4 dynamics. In the following, we use system (1) (presented in the main text) to describe the dynamics  
 5 of a disease. We consider the case where there is one vector population and one host population.  
 6 Thus we consider the system

$$\begin{aligned}\frac{d}{dt}I_V(t) &= \beta_{V,H} \frac{I_H(t)}{N_H} (N_V - I_V(t)) \\ \frac{d}{dt}I_H(t) &= \beta_{H,V} \frac{I_V(t)}{N_V} (N_H - I_H(t))\end{aligned}$$

7 where we denote the number of infected vectors by  $I_V(t)$ , the number of infected hosts by  $I_H(t)$ , the  
 8 total number of vectors by  $N_V$ , the total number of hosts by  $N_H$ , the transmission rate from hosts  
 9 to vectors by  $\beta_{V,H}$ , and the transmission rate from vectors to hosts by  $\beta_{H,V}$ .

10 For ease of notation, define

$$V(t) = \frac{I_V(t)}{N_V} \quad \text{and} \quad H(t) = \frac{I_H(t)}{N_H}$$

11 to be the proportion of the infected vector (host) population. Then rewriting the above system, we  
 12 have that

$$\begin{aligned}\frac{d}{dt}I_V(t) &= \beta_{V,H} \frac{I_H(t)}{N_H} S_v(t) \\ &= \beta_{V,H} \frac{I_H(t)}{N_H} (N_V - I_V(t)) \\ \frac{d}{dt} \frac{I_V(t)}{N_V} &= \beta_{V,H} \frac{I_H(t)}{N_H} \left(1 - \frac{I_V(t)}{N_V}\right) \\ \frac{d}{dt}V(t) &= \beta_{V,H} H(t)(1 - V(t))\end{aligned}$$

13 Similarly,

$$\frac{d}{dt}H(t) = \beta_{H,V} V(t)(1 - H(t)).$$

14 Lastly, for ease of notation, redefine

$$\beta_{V,H} = \alpha \quad \text{and} \quad \beta_{H,V} = \gamma.$$

15 Then our system becomes

$$\frac{d}{dt}V(t) = \alpha H(t)(1 - V(t)) \tag{S16a}$$

$$\frac{d}{dt}H(t) = \gamma V(t)(1 - H(t)) \tag{S16b}$$

16 The model variables and parameters are summarized in Table 2 in Text S3.

Table 2 in Text S3. SI model parameters and variables.

| Parameter or Variable  | Definition                               |
|------------------------|------------------------------------------|
| $I_H$                  | Number of infected hosts.                |
| $S_h$                  | Number of susceptible hosts.             |
| $I_V$                  | Number of infected vectors.              |
| $S_v$                  | Number of susceptible vectors.           |
| $N_H$                  | Total number of hosts.                   |
| $N_V$                  | Total number of vectors.                 |
| $H = \frac{I_H}{N_H}$  | Proportion of infected hosts.            |
| $V = \frac{I_V}{N_V}$  | Proportion of infected vectors.          |
| $\beta_{V,H} = \alpha$ | Transmission rate from hosts to vectors. |
| $\beta_{H,V} = \gamma$ | Transmission rate from vectors to hosts. |

### 1 S3.1 Basic analysis of (S16)

2 It is easy to see that system (S16) has two steady states,  $(V, H) = (0, 0)$  and  $(1, 1)$ . Examining the  
3 vector field of (S16), we see that

4

$$\begin{aligned}
V = 0, 0 < H < 1 &\Rightarrow \frac{dV}{dt} = \alpha H > 0, & \frac{dH}{dt} &= 0 \\
0 < V < 1, H = 0 &\Rightarrow \frac{dV}{dt} = 0, & \frac{dH}{dt} &= \gamma V > 0 \\
0 < V < 1, H = 1 &\Rightarrow \frac{dV}{dt} = \alpha(1 - V) > 0, & \frac{dH}{dt} &= 0 \\
V = 1, 0 < H < 1 &\Rightarrow \frac{dV}{dt} = 0, & \frac{dH}{dt} &= \gamma(1 - H) > 0 \\
0 < V < 1, 0 < H < 1 &\Rightarrow \frac{dV}{dt} = \alpha H(1 - V) > 0, & \frac{dH}{dt} &= \gamma V(1 - H) > 0
\end{aligned}$$

5 Thus, given an initial condition  $(V_0, H_0)$  such that  $V_0, H_0 \in [0, 1]$ ,  $(V_0, H_0) \notin \{(0, 0), (1, 1)\}$ ,  
6 the solution  $(V(t), H(t))$  approaches  $(1, 1)$  in infinite time. (Figure S1) Though this is not a realistic  
7 scenario, we are only concerned with the early-time behavior of the system and the infinite time  
8 dynamics are only of academic interest.

### 9 S3.2 First integral

10 Note that if  $V(t) > 0$ , then  $\frac{dH}{dt} > 0$  for all  $0 \leq H(t) < 1$ . Similarly, if  $H(t) > 0$ , then  $\frac{dV}{dt} > 0$  for all  
11  $0 \leq V(t) < 1$ . Note that neither  $V$  nor  $H$  may become negative so long as  $V(0) \geq 0$  and  $H(0) \geq 0$ .  
12 Then we may reparameterize our system (S16) as a function of  $V$  or as a function of  $H$ . We will  
13 choose to reparameterize our system as a function of  $H$ . Dividing (S16a) by (S16b), we have the  
14 auxiliary equation

$$\begin{aligned}
\frac{dV}{dH} &= \frac{\alpha H(t)(1 - V(t))}{\gamma V(t)(1 - H(t))} \\
&= \frac{\frac{\alpha}{V} - \alpha}{\frac{\gamma}{H} - \gamma}
\end{aligned} \tag{S17}$$

15 which we can solve by separation of variables:

$$\begin{aligned}
dV \left( \frac{V}{\alpha - \alpha V} \right) &= dH \left( \frac{H}{\gamma - \gamma H} \right) \\
\int \left( \frac{V}{\alpha - \alpha V} \right) dV &= \int \left( \frac{H}{\gamma - \gamma H} \right) dH \\
\frac{1}{\alpha} (-V - \ln(1 - V)) &= \frac{1}{\gamma} (-H - \ln(1 - H)) + c
\end{aligned}$$

1 where  $c$  is some constant. Then solutions of (S16) lie within the level sets of the function

$$I(V, H) = \frac{1}{\alpha} (-V - \ln(1 - V)) + \frac{1}{\gamma} (H + \ln(1 - H)).$$

2 In particular, given an initial condition  $(V_0, H_0)$ , the solution  $(V, H)$  of the initial value problem  
 3 (S16),  $V(0) = V_0$ ,  $H(0) = H_0$  satisfies

$$\begin{aligned}
I(V, H) &= I(V_0, H_0) \\
\frac{1}{\alpha} (-V - \ln(1 - V)) + \frac{1}{\gamma} (H + \ln(1 - H)) &= \frac{1}{\alpha} (-V_0 - \ln(1 - V_0)) + \frac{1}{\gamma} (H_0 + \ln(1 - H_0))
\end{aligned}$$

4 that is, the solution  $(V, H)$  lies in the level set

$$\{(V, H) | I(V, H) = I(V_0, H_0)\}.$$

### 5 S3.3 Optimal sampling

Suppose that  $C(s_V, s_H)$  is a strictly increasing cost function where  $s_V$  denotes the number of vectors sampled and  $s_H$  denotes the number of hosts sampled. Our goal is to find possible optimal sampling schemes  $s^* = (s_V^*, s_H^*)$  that maximize the probability of detecting a disease in a single sampling trial at a fixed time  $t$ , assuming that the vector and host population dynamics are known. With reference to Table 1 in Text S2, we see that there are three possible sampling schemes. First (Case 2 in Table 1 in Text S2), if there exists some  $s^*$  such that  $s_V^* \geq 0$  and  $s_H^* \geq 0$  and

$$\begin{aligned}
\frac{V(t)}{C_{s_V}(s^*)} &= \frac{H(t)}{C_{s_H}(s^*)} \\
\iff \frac{V(t)}{H(t)} &= \frac{C_{s_V}(s^*)}{C_{s_H}(s^*)}
\end{aligned}$$

then we may choose to sample both the vector and the host populations. Second (Case 4 in Table 1 in Text S2), if there exists some  $s^*$  such that  $s_V^* \geq 0$  and  $s_H^* = 0$  and

$$\begin{aligned}
\frac{V(t)}{C_{s_V}(s^*)} &> \frac{H(t)}{C_{s_H}(s^*)} \\
\iff \frac{V(t)}{H(t)} &> \frac{C_{s_V}(s^*)}{C_{s_H}(s^*)}
\end{aligned}$$

then we may choose to sample only the vector population. Third (Case 4 in Table 1 in Text S2), if there exists some  $s^*$  such that  $s_V^* = 0$  and  $s_H^* \geq 0$  and

$$\begin{aligned}
\frac{V(t)}{C_{s_V}(s^*)} &< \frac{H(t)}{C_{s_H}(s^*)} \\
\iff \frac{V(t)}{H(t)} &< \frac{C_{s_V}(s^*)}{C_{s_H}(s^*)}
\end{aligned}$$

then we may choose to sample only the host population. Since each of these cases depends on the ratio  $\frac{V}{H}$ , we now characterize this curve. We will first restate two useful equations and make some easy observations. Then, we will give two lemmas that elucidate some properties of the curve  $\frac{V(H)}{H}$ .

First, by (S17),

$$\frac{dV}{dH} = \frac{\alpha H (1 - V)}{\gamma V (1 - H)} \quad (\text{S18})$$

Then  $\frac{dV}{dH} > 0$  for all  $(V, H) \in [0, 1] \times [0, 1] \setminus \{(0, 0), (1, 1)\}$ . Since  $V(H)$  is increasing and  $V(H) \leq 1$  for  $H \in (0, 1)$ ,  $\lim_{H \rightarrow 1} V(H)$  exists. We claim that for  $(V_0, H_0) \in [0, 1] \times [0, 1] \setminus \{(0, 0)\}$ ,  $\lim_{H \rightarrow 1} V(H) = 1$ . If not, then there exists some  $0 < M < 1$  such that  $\lim_{H \rightarrow 1} V(H) = M$ . Then by the analysis in Section S3.1, it is easy to see that  $H_0 = 1$ , a contradiction to the uniqueness of solutions.

Suppose that the initial condition  $(V_0, H_0)$  is given, suppose that only one of  $V_0$  or  $H_0$  is positive, and let  $(V, H)$  be the solution to this initial value problem. Let  $I(V_0, H_0) = c$ . Then recall that  $(V, H)$  solves

$$\frac{1}{\alpha} (-V - \ln(1 - V)) + \frac{1}{\gamma} (H + \ln(1 - H)) = c. \quad (\text{S19})$$

Note that

$$\begin{aligned} V_0 = 0, H_0 > 0 &\Rightarrow I(V_0, H_0) < 0 \\ V_0 = 0, H_0 = 0 &\Rightarrow I(V_0, H_0) = 0 \\ V_0 > 0, H_0 = 0 &\Rightarrow I(V_0, H_0) > 0 \end{aligned}$$

by (S19). Then, since at most one of  $V_0$  or  $H_0$  is positive, any initial condition  $(V_0, H_0)$  must satisfy exactly one of the above conditions. Since the sign of  $I(V_0, H_0)$  implied in the above relations is unique for each class of initial condition  $(V_0, H_0)$ , we have that

$$\begin{aligned} V_0 = 0, H_0 > 0 &\Leftrightarrow I(V_0, H_0) < 0 \\ V_0 = 0, H_0 = 0 &\Leftrightarrow I(V_0, H_0) = 0 \\ V_0 > 0, H_0 = 0 &\Leftrightarrow I(V_0, H_0) > 0. \end{aligned}$$

We now prove two lemmas that are useful in characterizing the curve  $\frac{V(H)}{H}$ .

**Lemma 1.** *Under the following conditions, there exists some unique  $H^* \in (H_0, 1)$  that solves  $V(H) = H$ :*

1.  $\alpha < \gamma$  and  $I(V_0, H_0) = c > 0$  or

2.  $\alpha > \gamma$  and  $I(V_0, H_0) = c < 0$ .

Otherwise, there exists no such  $H^*$ .

*Proof.* Suppose that

$$\left( \frac{1}{\alpha} - \frac{1}{\gamma} \right) (-H^* - \ln(1 - H^*)) = c. \quad (\text{S20})$$

Then by (S19),

$$-H^* - \ln(1 - H^*) = -V(H^*) - \ln(1 - V(H^*)).$$

Since the function  $F(x) = -x - \ln(1 - x)$  is strictly increasing for  $x \in (0, 1)$ , the above equation implies that  $V(H^*) = H^*$ . We now show that there exists some  $H^* \in (0, 1)$  that solves (S20).

Note that the function  $F(x) = -x - \ln(1 - x)$  is positive and strictly increasing for  $x \in (0, 1)$ . In addition,  $F(0) = 0$  and  $\lim_{H \rightarrow 1} F(H) = \infty$ . Then, since  $c, \alpha$  and  $\gamma$  are constants, there exists

- 1 some unique  $H^* \in (0, 1)$  that solves (S20) if and only if  $c \neq 0$  and the sign of  $c$  is the same as the  
 2 sign of  $\left(\frac{1}{\alpha} - \frac{1}{\gamma}\right)$ . It remains only to be shown that  $H^* \in (H_0, 1)$ .

If Condition (1) in Lemma 1 holds, then  $H_0 = 0$  and  $H^* \in (H_0, 1) = (0, 1)$  trivially. If Condition (2) in Lemma 1 holds, then  $H_0 > 0$ ,  $V_0 = 0$ ,

$$0 > \left(\frac{1}{\alpha} - \frac{1}{\gamma}\right)(-H_0 - \ln(1 - H_0)) > -\frac{1}{\gamma}(-H_0 - \ln(1 - H_0)) = c$$

by (S19) and

$$\lim_{H \rightarrow 1} \left(\frac{1}{\alpha} - \frac{1}{\gamma}\right)(-H - \ln(1 - H)) = -\infty.$$

- 3 Then there exists some  $H^* \in (H_0, 1)$  which solves (S20). □

- 4 Lemma 1 gives conditions under which the curve  $\frac{V(H)}{H}$  intersects the horizontal line at 1.  
 5 Note that if there exists some  $H^* \in (H_0, 1)$  such that  $V(H^*) = H^*$ , then  $\frac{V(H^*)}{H^*} = 1$ . If no such  $H^*$   
 6 exists, then the curve  $\frac{V(H)}{H}$  must remain above or below the horizontal line at 1 for all  $H \in (H_0, 1)$ .

- 7 **Lemma 2.** Suppose that  $H < V(H)$  for all  $H \in (H_1, H_2) \subseteq (H_0, 1)$ ,  $\alpha > \gamma > 0$ . Then there exists  
 8 at most one  $\bar{H} \in (H_1, H_2)$  such that  $\left.\frac{d}{dH} \frac{V(H)}{H}\right|_{H=\bar{H}} = 0$ .

*Proof.* Note that

$$\begin{aligned} \frac{d}{dH} \frac{V(H)}{H} &= \frac{H \frac{dV}{dH} - V}{H^2} \\ &= \frac{\alpha H \left(\frac{1}{V} - 1\right) - \gamma V \left(\frac{1}{H} - 1\right)}{\gamma H(1 - H)} \end{aligned} \quad (\text{S21})$$

and suppose  $\bar{H} \in (H_1, H_2)$  such that  $\left.\frac{d}{dH} \frac{V(H)}{H}\right|_{H=\bar{H}} = 0$ . Since the denominator of (S21) is strictly positive, it must be true that

$$\begin{aligned} \alpha \bar{H} \left(\frac{1}{V(\bar{H})} - 1\right) &= \gamma V(\bar{H}) \left(\frac{1}{\bar{H}} - 1\right) \\ \alpha \left(\frac{1 - V(\bar{H})}{V^2(\bar{H})}\right) &= \gamma \left(\frac{1 - \bar{H}}{\bar{H}^2}\right). \end{aligned} \quad (\text{S22})$$

Now,

$$\begin{aligned} \frac{d}{dH} \frac{1 - V(\bar{H})}{V^2(\bar{H})} &= \frac{1}{V^4} \left[ -V^2 \frac{dV}{dH} - 2V(1 - V) \frac{dV}{dH} \right] \\ &= \frac{\alpha(V - 2)H(1 - V)}{\gamma V^4(1 - H)} \end{aligned}$$

by (S18) and

$$\frac{d}{dH} \frac{1 - H}{H^2} = \frac{H - 2}{H^3}.$$

We claim that

$$\frac{d}{dH} \frac{1 - V(\bar{H})}{V^2(\bar{H})} > \frac{d}{dH} \frac{1 - H}{H^2} \quad (\text{S23})$$

for  $H \in (H_1, H_2)$ . (S23) holds if and only if

$$\begin{aligned} \frac{\alpha(V-2)H(1-V)}{\gamma V^4(1-H)} &> \frac{H-2}{H^3} \\ \frac{\alpha(V-2)(1-V)}{V^4} &> \frac{\gamma(H-2)(1-H)}{H^4}. \end{aligned}$$

Since  $\frac{(x-2)(1-x)}{x^4}$  is an increasing function for  $x \in [0, 1]$  and since  $H < V$  we have that

$$\begin{aligned} \frac{(V-2)(1-V)}{V^4} &> \frac{(H-2)(1-H)}{H^4} \\ \frac{\alpha(V-2)(1-V)}{V^4} &> \frac{\gamma(H-2)(1-H)}{H^4} \end{aligned}$$

since  $\alpha > \gamma$ . Thus (S23) holds. Since  $\alpha > \gamma > 0$ ,

$$\frac{d}{dH} \alpha \left( \frac{1-V(\bar{H})}{V^2(\bar{H})} \right) > \frac{d}{dH} \gamma \left( \frac{1-H}{H^2} \right)$$

1 for all  $H \in (H_1, H_2)$ . Then if there exists some  $\bar{H} \in (H_1, H_2) \subseteq (0, 1)$  such that (S22) holds, it is  
2 unique.  $\square$

3 Assuming that the disease starts in either the vector population or the host population (not  
4 both), there are six possible characterizations of  $\frac{V(H)}{H}$ :

5 Case 1:  $\alpha > \gamma$ ,  $V_0 > 0$ ,  $H_0 = 0$ . Since  $V_0 > 0$  and  $H_0 = 0$ , we have that  $c > 0$ . Note that  
6  $\frac{V(H_0)}{H_0} = \frac{V_0}{H_0} = \infty$ . Then since  $\alpha > \gamma$ ,  $\frac{V(H)}{H} > 1$  for all  $H \in (H_0, 1)$  by Lemma 1.

7 We claim that  $\frac{d}{dH} \frac{V(H)}{H} \leq 0$  for all  $H \in (H_0, 1)$ . Indeed, if not, then there exists some  
8  $\tilde{H} \in (H_0, 1)$  such that  $\frac{d}{dH} \frac{V(H)}{H} \Big|_{H=\tilde{H}} > 0$ . Note that since  $V_0 > 0$  and  $H_0 = 0$ ,  $\frac{d}{dH} \frac{V(H)}{H} \Big|_{H=H_0} = -\infty$ .

9 Then there must exist some  $\bar{H} \in (H_0, \tilde{H})$  such that  $\frac{d}{dH} \frac{V(H)}{H} \Big|_{H=\bar{H}} = 0$ . Since  $\frac{V(H)}{H} > 1$  for  
10 all  $H \in (H_0, 1)$  by the above argument and since  $\tilde{H} \in (H_0, 1)$ , we have that  $\frac{V(\tilde{H})}{\tilde{H}} > 1$ . Since

11  $\lim_{H \rightarrow 1} \frac{V(H)}{H} = 1$ , it must be true that  $\frac{V(H)}{H}$  is decreasing for some  $H > \tilde{H}$  and therefore that there  
12 exists some  $\bar{H}_2 \in (\tilde{H}, 1)$  such that  $\frac{d}{dH} \frac{V(H)}{H} \Big|_{H=\bar{H}_2} = 0$ . This contradicts the uniqueness of  $\bar{H}$  by

13 Lemma 2. Thus, the claim holds.

Case 2:  $\alpha > \gamma$ ,  $V_0 = 0$ ,  $H_0 > 0$ . Since  $V_0 = 0$  and  $H_0 > 0$ , we have that  $c < 0$ . Note that  
 $\frac{V(H_0)}{H_0} = \frac{V_0}{H_0} = 0$ . By Lemma 1 there exists some unique  $H^* \in (H_0, 1)$  such that  $\frac{V(H^*)}{H^*} = 1$ . Then  
 $\frac{V(H)}{H} < 1$  for  $H \in (H_0, H^*)$ . We claim that  $\frac{V(H)}{H} > 1$  for  $H \in (H^*, 1)$ . If not, then  $V(H) \leq H$  for  
all  $H \in (H_0, 1)$  and by (S21)

$$\begin{aligned} \frac{d}{dH} \frac{V(H)}{H} &= \frac{\alpha H \left( \frac{1}{V} - 1 \right) - \gamma V \left( \frac{1}{H} - 1 \right)}{\gamma H(1-H)} \\ &\geq \frac{\alpha H \left( \frac{1}{H} - 1 \right) - \gamma H \left( \frac{1}{H} - 1 \right)}{\gamma H(1-H)} = \frac{\alpha - \gamma}{\gamma H} > 0 \end{aligned} \tag{S24}$$

14 since  $\alpha > \gamma > 0$ . Then since  $\frac{V(H^*)}{H^*} = 1$ , there must exist some  $\tilde{H} \in (H^*, 1)$  such that  $\frac{V(\tilde{H})}{\tilde{H}} > 1$ , a  
15 contradiction to that  $V(H) \leq H$  for all  $H \in (H_0, 1)$ . Thus the claim holds.

16 Now we examine the sign of  $\frac{d}{dH} \frac{V(H)}{H}$ . First, we claim that  $\frac{d}{dH} \frac{V(H)}{H} > 0$  for all  $H \in (H_0, H^*)$ .  
17 Note that for  $H \in (H_0, H^*)$ ,  $H \geq V(H)$ . Then the claim holds by (S24).

18 Next we claim that there exists some  $\bar{H} \in (H^*, 1)$  such that  $\frac{d}{dH} \frac{V(H)}{H} > 0$  for all  $H \in (H_0, \bar{H})$   
19 and  $\frac{d}{dH} \frac{V(H)}{H} < 0$  for all  $H \in (\bar{H}, 1)$ . Indeed, by the above argument,  $\frac{d}{dH} \frac{V(H)}{H} \Big|_{H=H^*} > 0$ . Recall that  
20  $\frac{V(H^*)}{H^*} = 1$ . Then there exists some  $H_1 \in (H^*, 1)$  such that  $\frac{V(H_1)}{H_1} > 1$ . Then since  $\lim_{H \rightarrow 1} \frac{V(H)}{H} = 1$

there must exist some  $H_2 \in (H_1, 1)$  such that  $\left. \frac{d}{dH} \frac{V(H)}{H} \right|_{H=H_2} < 0$ . Then by the continuity of  $\frac{d}{dH} \frac{V(H)}{H}$  there exists some  $\bar{H} \in (H^*, H_2) \subset (H^*, 1)$  such that  $\left. \frac{d}{dH} \frac{V(H)}{H} \right|_{H=\bar{H}} = 0$ . By Lemma 2 this  $\bar{H}$  is unique. Thus the claim holds.

Case 3:  $\alpha = \gamma$ ,  $V_0 > 0$ ,  $H_0 = 0$ . Since  $V_0 > 0$  and  $H_0 = 0$ , we have that  $c > 0$ . Note that  $\frac{V(H_0)}{H_0} = \frac{V_0}{H_0} = \infty$ . Then since  $\alpha = \gamma$ ,  $\frac{V(H)}{H} > 1$  for all  $H \in (H_0, 1)$  by Lemma 1.

We claim that  $\frac{d}{dH} \frac{V(H)}{H} < 0$  for all  $H \in (H_0, 1)$ . Since  $V(H) > H$  for all  $H \in (H_0, 1)$ ,

$$\alpha H \left( \frac{1}{V} - 1 \right) - \gamma V \left( \frac{1}{H} - 1 \right) < \alpha H \left( \frac{1}{H} - 1 \right) - \gamma H \left( \frac{1}{H} - 1 \right) = \alpha - \gamma = 0.$$

then the claim holds by (S21).

Case 4:  $\alpha = \gamma$ ,  $V_0 = 0$ ,  $H_0 < 0$ . Since  $V_0 = 0$  and  $H_0 > 0$ , we have that  $c < 0$ . Note that  $\frac{V(H_0)}{H_0} = \frac{V_0}{H_0} = 0$ . Then since  $\alpha = \gamma$ ,  $\frac{V(H)}{H} < 1$  for all  $H \in (H_0, 1)$  by Lemma 1. By an argument similar to that in Case 3,  $\frac{d}{dH} \frac{V(H)}{H} > 0$  for all  $H \in (H_0, 1)$ .

Case 5:  $\alpha < \gamma$ ,  $V_0 > 0$ ,  $H_0 = 0$ . Since  $V_0 > 0$  and  $H_0 = 0$ , we have that  $c > 0$ . Note that  $\frac{V(H_0)}{H_0} = \frac{V_0}{H_0} = \infty$ . By Lemma 1 there exists some unique  $H^* \in (H_0, 1)$  such that  $\frac{V(H^*)}{H^*} = 1$ . By an argument similar to that in Case 2, we have that  $\frac{V(H)}{H} < 1$  for  $H \in (H^*, 1)$  and that there exists some  $\bar{H} \in (H^*, 1)$  such that  $\frac{d}{dH} \frac{V(H)}{H} < 0$  for all  $H \in (H_0, \bar{H})$  and  $\frac{d}{dH} \frac{V(H)}{H} > 0$  for all  $H \in (\bar{H}, 1)$ .

Case 6:  $\alpha < \gamma$ ,  $V_0 = 0$ ,  $H_0 > 0$ . Since  $V_0 = 0$  and  $H_0 > 0$ , we have that  $c < 0$ . Note that  $\frac{V(H_0)}{H_0} = \frac{V_0}{H_0} = 0$ . Then since  $\alpha < \gamma$ ,  $\frac{V(H)}{H} < 1$  for all  $H \in (H_0, 1)$  by Lemma 1. By an argument similar to that in Case 1,  $\frac{d}{dH} \frac{V(H)}{H} \geq 0$  for all  $H \in (H_0, 1)$ .

We summarize the above cases in Table 3 in Text S3 and illustrate them in Figures S2 and 1.

**Table 3 in Text S3. Summary of possible characterizations of  $\frac{V(H)}{H}$  with all possible cases listed.**

|        | $\alpha, \gamma$  | Initial Conditions                                                                           | $\frac{V(H)}{H}$                                                                                                                                                                   | $\frac{d}{dH} \frac{V(H)}{H}$                                                                                                                                                                                               |
|--------|-------------------|----------------------------------------------------------------------------------------------|------------------------------------------------------------------------------------------------------------------------------------------------------------------------------------|-----------------------------------------------------------------------------------------------------------------------------------------------------------------------------------------------------------------------------|
| Case 1 | $\alpha > \gamma$ | $V_0 > 0, H_0 = 0,$<br>$\lim_{V \rightarrow V_0, H \rightarrow H_0} \frac{V(H)}{H} = \infty$ | $\frac{V(H)}{H} > 1 \forall H \in (H_0, 1)$                                                                                                                                        | $\frac{d}{dH} \frac{V(H)}{H} \leq 0 \forall H \in (H_0, 1)$                                                                                                                                                                 |
| Case 2 | $\alpha > \gamma$ | $V_0 = 0, H_0 > 0,$<br>$\frac{V_0}{H_0} = 0$                                                 | $\exists! H^* \in (H_0, 1)$ s.t.<br>$\begin{cases} \frac{V(H)}{H} < 1 \forall H \in (H_0, H^*) \\ \frac{V(H^*)}{H^*} = 1 \\ \frac{V(H)}{H} > 1 \forall H \in (H^*, 1) \end{cases}$ | $\exists! H \in (H^*, 1)$ s.t.<br>$\begin{cases} \frac{d}{dH} \frac{V(H)}{H} > 0 \forall H \in (H_0, \bar{H}) \\ \frac{d}{dH} \frac{V(H)}{H} = 0 \\ \frac{d}{dH} \frac{V(H)}{H} < 0 \forall H \in (\bar{H}, 1) \end{cases}$ |
| Case 3 | $\alpha = \gamma$ | $V_0 > 0, H_0 = 0,$<br>$\lim_{V \rightarrow V_0, H \rightarrow H_0} \frac{V(H)}{H} = \infty$ | $\frac{V(H)}{H} > 1 \forall H \in (H_0, 1)$                                                                                                                                        | $\frac{d}{dH} \frac{V(H)}{H} < 0 \forall H \in (H_0, 1)$                                                                                                                                                                    |
| Case 4 | $\alpha = \gamma$ | $V_0 = 0, H_0 > 0,$<br>$\frac{V_0}{H_0} = 0$                                                 | $\frac{V(H)}{H} < 1 \forall H \in (H_0, 1)$                                                                                                                                        | $\frac{d}{dH} \frac{V(H)}{H} > 0 \forall H \in (H_0, 1)$                                                                                                                                                                    |
| Case 5 | $\alpha < \gamma$ | $V_0 > 0, H_0 = 0,$<br>$\lim_{V \rightarrow V_0, H \rightarrow H_0} \frac{V(H)}{H} = \infty$ | $\exists! H^* \in (H_0, 1)$ s.t.<br>$\begin{cases} \frac{V(H)}{H} > 1 \forall H \in (H_0, H^*) \\ \frac{V(H^*)}{H^*} = 1 \\ \frac{V(H)}{H} < 1 \forall H \in (H^*, 1) \end{cases}$ | $\exists! H \in (H^*, 1)$ s.t.<br>$\begin{cases} \frac{d}{dH} \frac{V(H)}{H} < 0 \forall H \in (H_0, \bar{H}) \\ \frac{d}{dH} \frac{V(H)}{H} = 0 \\ \frac{d}{dH} \frac{V(H)}{H} > 0 \forall H \in (\bar{H}, 1) \end{cases}$ |
| Case 6 | $\alpha < \gamma$ | $V_0 = 0, H_0 > 0,$<br>$\frac{V_0}{H_0} = 0$                                                 | $\frac{V(H)}{H} < 1 \forall H \in (H_0, 1)$                                                                                                                                        | $\frac{d}{dH} \frac{V(H)}{H} \geq 0 \forall H \in (H_0, 1)$                                                                                                                                                                 |

### 1 S3.3.1 Linear cost function

Now we assume that our cost function is linear:

$$C(s_V, s_H) = a_V + b_V s_V + a_H + b_H s_H.$$

Then

$$C_{s_V} = b_V \quad \text{and} \quad C_{s_H} = b_H.$$

- 2 By the analysis in Section S3.3, it is clear that the optimal sampling design is determined by the  
 3 relative magnitudes of  $\frac{V(H)}{H}$  and the constant  $\frac{b_V}{b_H}$ . We consider only cases 1 and 2 above. The other  
 4 cases follow similarly.

Case 1:  $\alpha > \gamma$ ,  $V_0 > 0$ ,  $H_0 = 0$ . By the above analysis,  $\frac{V(H)}{H} > 1$  and  $\frac{d}{dH} \frac{V(H)}{H} \leq 0$  for all  $H \in (H_0, 1)$ . If  $\frac{b_V}{b_H} \leq 1$ , then

$$\frac{V(H)}{H} > 1 \geq \frac{b_V}{b_H} = \frac{C_{s_V}}{C_{s_H}}$$

for all  $H \in (H_0, 1)$ , so by the analysis of Section S3.3, we choose to sample only the vector population.

If  $\frac{b_V}{b_H} > 1$ , then since  $\lim_{V \rightarrow V_0, H \rightarrow H_0} \frac{V(H)}{H} = \infty$ , there exists some  $\hat{H}$  such that

$$\begin{cases} \frac{V(H)}{H} > \frac{b_V}{b_H} \quad \forall H \in (H_0, \hat{H}) \\ \frac{V(\hat{H})}{\hat{H}} = \frac{b_V}{b_H} \\ \frac{V(H)}{H} > \frac{b_V}{b_H} \quad \forall H \in (\hat{H}, 1) \end{cases}$$

- 5 Note that  $\hat{H}$  is unique by Lemma 2. Then by the analysis of Section S3.3, at early times in the  
 6 epidemic (when  $H \in (H_0, \hat{H})$ ), we should sample only the vector population and at late times (when  
 7  $H \in (\hat{H}, 1)$ ) we should sample only the host population. Additionally, there exists some intermediate  
 8 instant (when  $H = \hat{H}$ ) at which we should sample both the vector and host populations.

Case 2:  $\alpha > \gamma$ ,  $V_0 = 0$ ,  $H_0 > 0$ . By the above analysis, there exists some unique  $H^* \in (H_0, 1)$  such that

$$\begin{cases} \frac{V(H)}{H} < 1 \quad \forall H \in (H_0, H^*) \\ \frac{V(H^*)}{H^*} = 1 \\ \frac{V(H)}{H} > 1 \quad \forall H \in (H^*, 1) \end{cases}$$

and there exists some unique  $\bar{H} \in (H^*, 1)$  such that

$$\begin{cases} \frac{d}{dH} \frac{V(H)}{H} > 0 \quad \forall H \in (H_0, \bar{H}) \\ \frac{d}{dH} \frac{V(\bar{H})}{\bar{H}} = 0 \\ \frac{d}{dH} \frac{V(H)}{H} < 0 \quad \forall H \in (\bar{H}, 1) \end{cases}$$

Then  $\frac{V(H)}{H}$  achieves a unique maximum at  $\bar{H} \in (H_0, 1)$ . If

$$\frac{V(\bar{H})}{\bar{H}} < \frac{b_V}{b_H}$$

then

$$\frac{V(H)}{H} < \frac{b_V}{b_H} = \frac{C_{s_V}}{C_{s_H}}$$

for all  $H \in (H_0, 1)$ . By the analysis in Section S3.3, we choose to sample only the host population.  
 If

$$\frac{V(\bar{H})}{\bar{H}} > \frac{b_V}{b_H}$$



then there exist some  $H_1, H_2 \in (H_0, 1)$ ,  $H_1 < H_2$  such that

$$\begin{cases} \frac{V(H)}{H} < \frac{b_V}{b_H} \quad \forall H \in (H_0, H_1) \\ \frac{V(H_1)}{H_1} = \frac{b_V}{b_H} \\ \frac{V(H)}{H} > \frac{b_V}{b_H} \quad \forall H \in (H_1, H_2) \\ \frac{V(H_2)}{H_2} = \frac{b_V}{b_H} \\ \frac{V(H)}{H} < \frac{b_V}{b_H} \quad \forall H \in (H_2, 1) \end{cases}$$

1 Then at early stages of the epidemic (while  $H \in (H_0, H_1)$ ), we should sample only the host popula-  
 2 tion, at intermediate times (while  $H \in (H_1, H_2)$ ) we sample only the vector population, and at late  
 3 times in the epidemic (while  $H \in (H_2, 1)$ ) we return to sampling only host population. As in Case  
 4 1, if  $H = H_1$  or  $H = H_2$ , then we should sample both the vector and host populations.

5 As in the main text, we find that there is a critical time at which we should switch our  
 6 sampling scheme. We can solve for this critical time numerically.
